# Supplementary material
Source: PubMed Central journal article supplement (PMC3735935)
Supplement: supp_M036996_jlr.M036996-1.pdf [file supp_M036996_jlr.M036996-1.pdf]

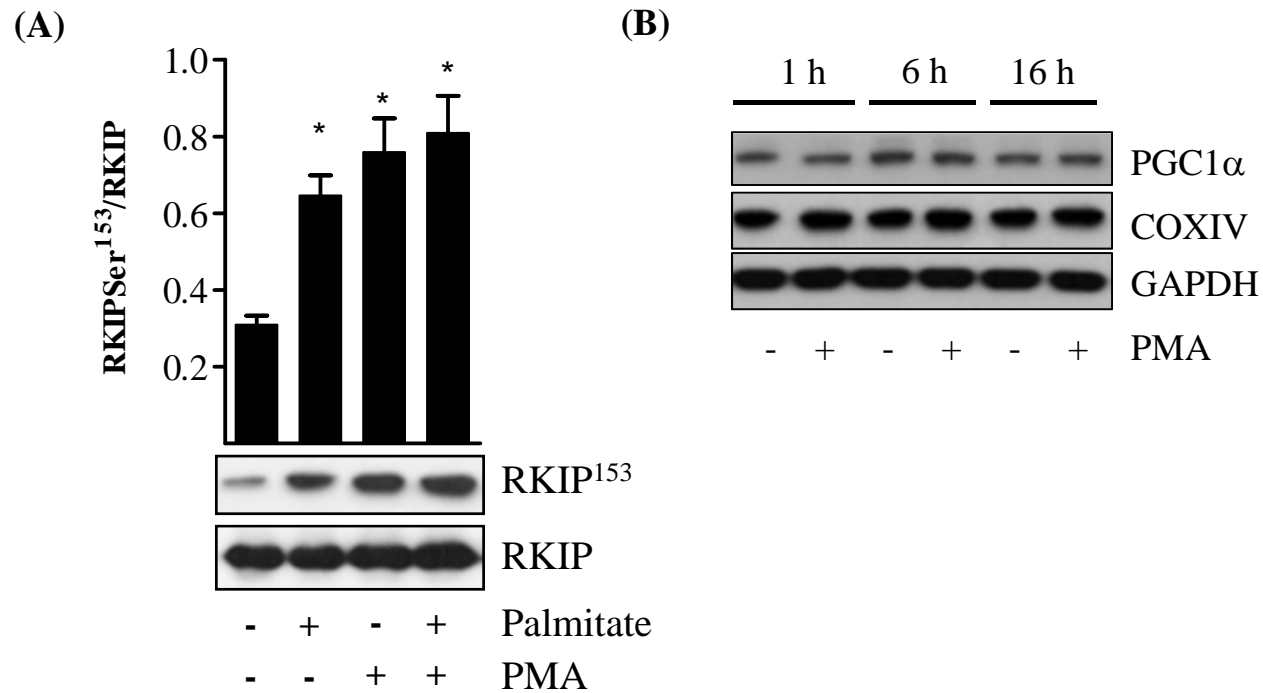

**Figure S1: Effects of PMA and palmitate on RKIP phosphorylation, cellular PGC1a and COXIV protein expression.**

(A) L6 myotubes were incubated with palmitate or vehicle control for 16 h. For the final 1 h, cells were treated with or without 100 nM PMA as indicated. Resulting cell lysates were then immunoblotted for native and phospho (Ser153) RKIP as shown. Values are mean  $\pm$  SEM asterisks represent significant change from the untreated control. (B) L6 myotubes were treated with 100 nM PMA or vehicle control for the times indicated. Resulting cell lysates were immunoblotted for PGC1 $\alpha$ , COXIV and GAPDH as shown. Blots are representative of three independent experiments.
