# Supplementary material
Source: PubMed Central journal article supplement (PMC3735935)
Supplement: supp_M036996_jlr.M036996-2.pdf [file supp_M036996_jlr.M036996-2.pdf]

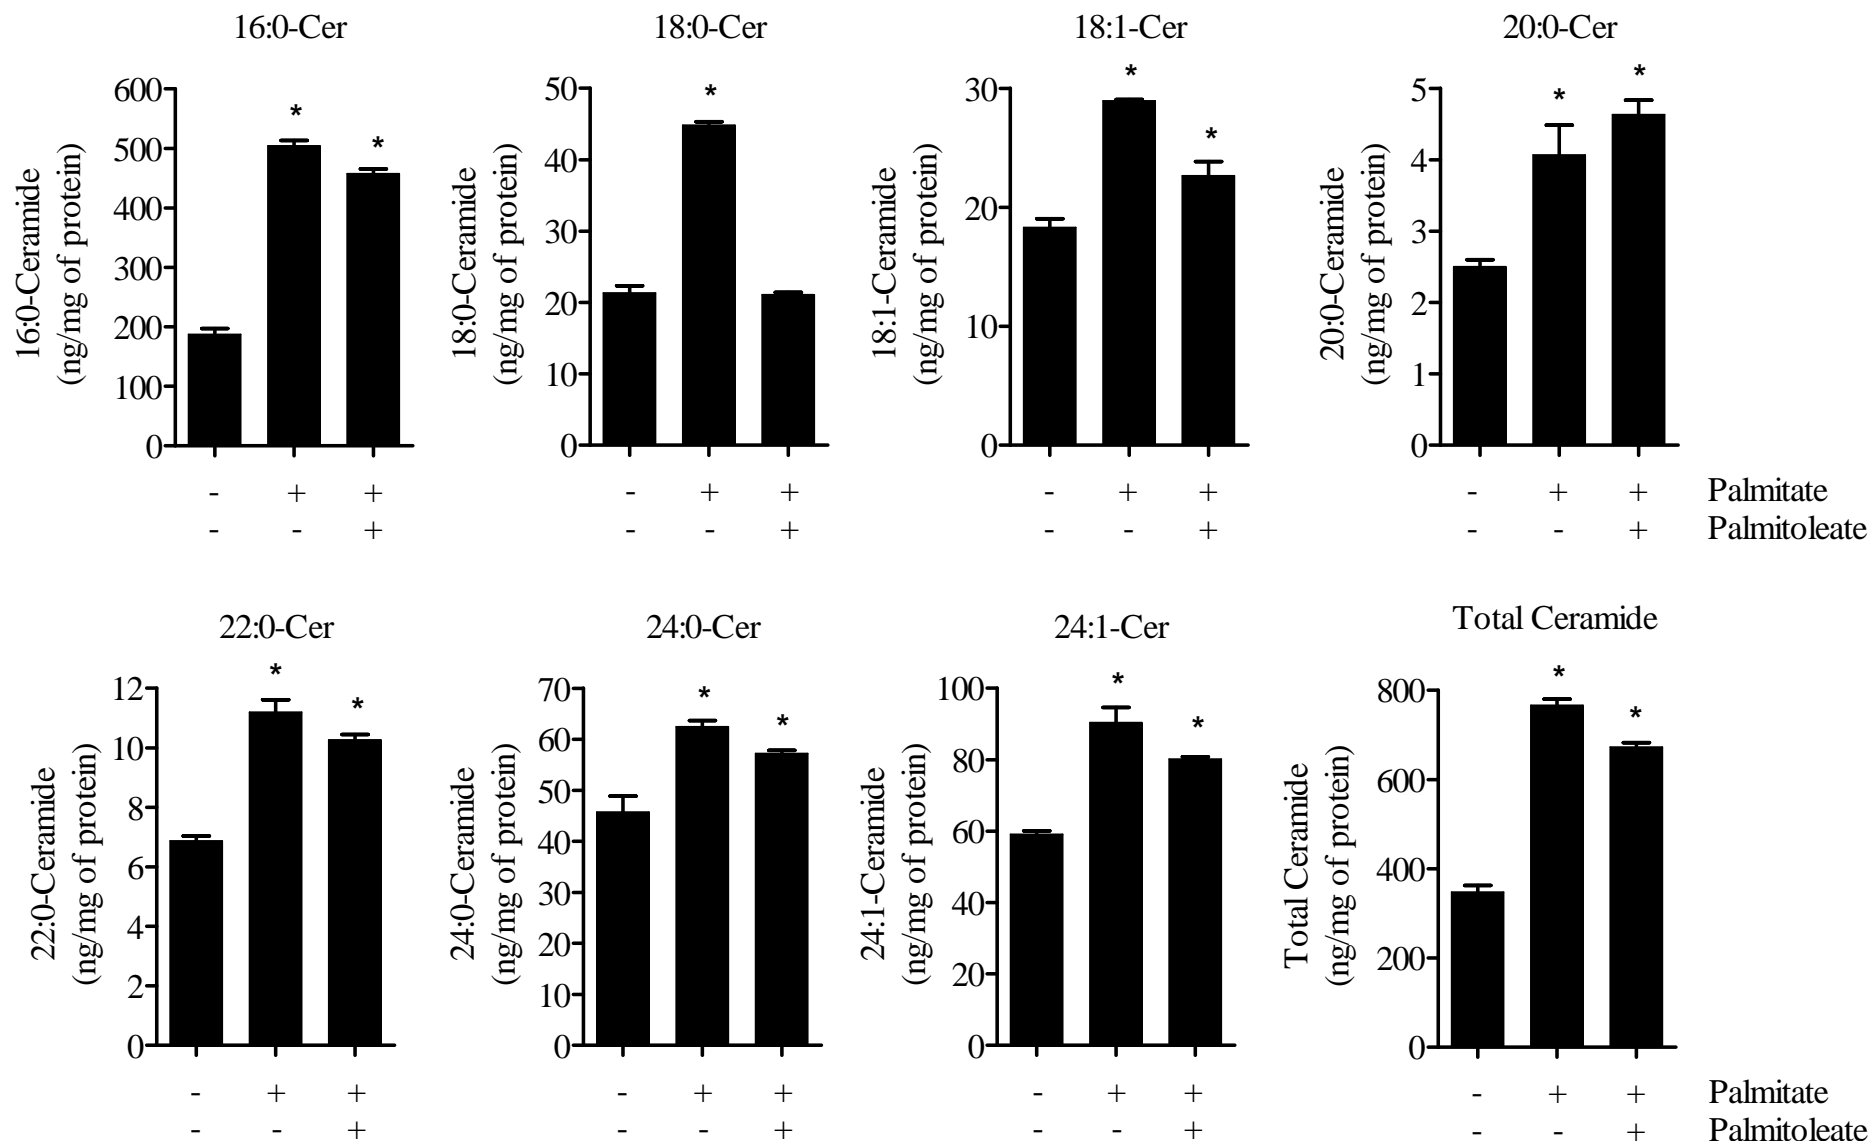

**Figure S2: Effects of palmitate and palmitoleate upon intramyocellular abundance of different ceramide species.**

L6 myotubes were incubated with palmitate (0.75 mM) and/or palmitoleate (0.75 mM) for 16 h. Following this incubation, muscle cells were harvested in ice cold PBS and lipids extracted to assess ceramide content as described in the Methods section. Bars represent mean  $\pm$  SEM from 3 separate experiments and asterisks signify a significant difference from the untreated control values ( $P < 0.05$ ).
