# Supplementary material
Source: PubMed Central journal article supplement (PMC3735935)
Supplement: supp_M036996_jlr.M036996-3.pdf [file supp_M036996_jlr.M036996-3.pdf]

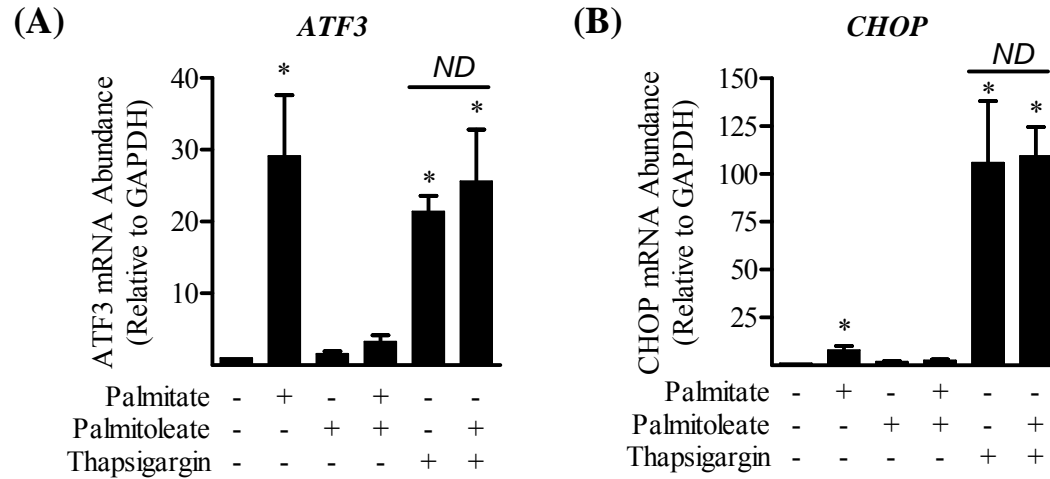

**Figure S3: Palmitoleate represses palmitate-induced, but not thapsigargin-induced ER stress.**

The effects of palmitate, palmitoleate and thapsigargin on (A) ATF3 and (B) CHOP mRNA abundance was assessed following cell treatment treated for 16h with 750 $\mu$ M palmitate, 750 $\mu$ M palmitoleate or 1 $\mu$ M thapsigargin as indicated. RNA was extracted and first-strand cDNA synthesis carried out. Relative mRNA levels were assayed using real-time PCR with the following oligos: ATF3 forward GAGTCAGTCACCATCAACAA , ATF3 reverse GCAGCAATTTTGTTCCTTCC, CHOP1 forward ACGTCGATCATACCATGTTGAAG, CHOP1 reverse GGTTCCTGCTTTCAGGTGTGG and GAPDH reverse GCTTCACCACCTTCTTGAT.
