# Supplementary material
Source: PubMed Central journal article supplement (PMC3735935)
Supplement: supp_M036996_jlr.M036996-4.pdf [file supp_M036996_jlr.M036996-4.pdf]

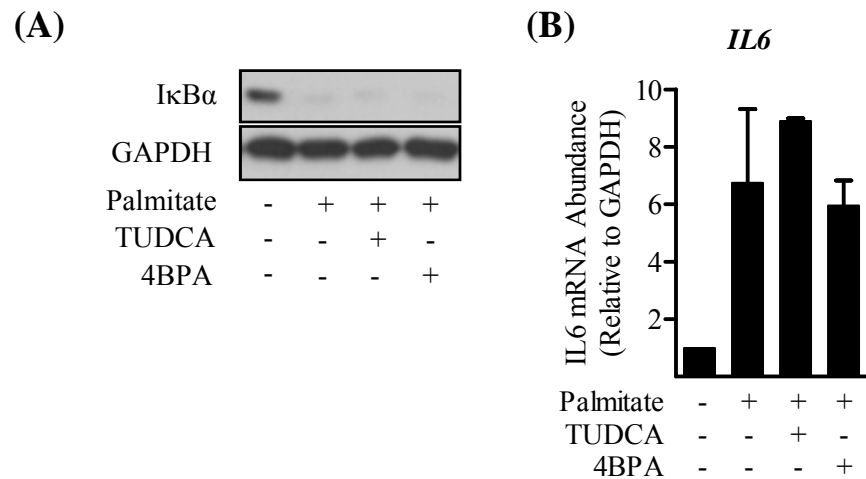

**Figure S4: ER stress inhibitors do not suppress palmitate-induced proinflammatory signalling in L6 myotubes.**

Muscle cells were treated with 0.75 mM palmitate for 16 h in the absence or presence of 5 mM TUDCA (tauroursodeoxycholic acid) or 10 mM 4BPA (4-phenylbutyric acid) as indicated. (A) Cell lysates prepared following treatment were immunoblotted using the antibodies against IkB $\alpha$  and GAPDH (loading control). (B) Effects of palmitate, TUDCA and 4-BPA on IL-6 mRNA abundance. L6 myotubes were treated for 16h with 750 $\mu$ M palmitate, or ER stress inhibitors as indicated. RNA was extracted and first-strand cDNA synthesis carried out. Relative mRNA levels were assayed using real-time PCR with IL6 or GAPDH oligos (IL6 reverse GCCATTGCACAACCTCTTTTCTC, GAPDH forward TGGAAAGCTGTGGCGTGAT and GAPDH reverse GCTTCACCACCTTCTTGAT).
